# Supplementary material for: High-performance aqueous symmetric supercapacitors based on Ni6MnO8–MnCO3 composite self-supported electrodes
Source: Royal Society of Chemistry journal article supplement (doi:10.1039/d2tc03899d), 2023-01-01
Supplement: d2tc03899d1.pdf [file d2tc03899d1.pdf]

## High-performance aqueous symmetric supercapacitor based on Ni<sub>6</sub>MnO<sub>8</sub>-MnCO<sub>3</sub> composites self-supported electrode

S. Luo<sup>a, b</sup>, J.E. Li<sup>a, b, \*</sup>, P.F. Xu<sup>a</sup>, X.Y. Han<sup>b</sup>, L. Chen<sup>b</sup>, C.G. Hu<sup>b, \*</sup>

<sup>a</sup> School of Resources, Environment and Materials, Guangxi Key Laboratory of Processing for Non-ferrous Metals and Featured Materials, Guangxi University, Nanning, Guangxi 530004, P.R. China

<sup>b</sup> Department of Applied Physics, Chongqing University, Chongqing 400044, China

\* Corresponding author.

E-mail addresses: hucg@cqu.edu.cn (CG Hu); ljen@gxu.edu.cn (JE Li).

### Contents

**Fig. S1.** (a, b) XPS spectra: O 1s and C 1s of NMO-2@ACC.

**Fig. S2.** FESEM images of NMO-2 at different magnification: (a-c) hydrothermal treatment at 80 °C and (d-f) 150 °C.

**Fig. S3.** (a, b) EDS spectra of the NMO-2@ACC at different areas.

**Fig. S4.** CV and GCD curves of NMO-2@ACC within (a), (b) 0-1V and (c), (d) -0.8-0V.

**Fig. S5.** (a) FESEM image of NMO-2@ACC after 5000<sup>th</sup> cycles. (b) XRD patterns of before and after cycling.

**Fig. S6.** (a) CV curves of NMO-2@ACC symmetric SC at voltage of 0-1.8 V and (b) -0.8-1 V. (c) Corresponding areal capacitances of NMO-2@ACC symmetric SC.

**Fig. S7.** GCD curve of 2 NMO-2@ACC SCs in series at a current density of 8 mA cm<sup>-2</sup>.

**Table S1** Comparison of relative area ratio of Mn<sup>2+</sup> in Mn 2p and CO<sub>3</sub><sup>2-</sup> in O 1s high-resolution XPS spectra.

## Calculation

The calculation formulas we use in this paper are as follows. The areal capacitance was calculated by the CV curves using

$$C_{s, s} = \frac{\int IdV}{2s \cdot v \cdot \Delta V} \quad (1)$$

where  $\int IdV$  represents the area of closed CV curve, the  $s$  represents the area of the electrode,  $\Delta V$  and  $v$  are the potential window and scanning rate, and GCD plot using

$$C_{s, s} = \frac{I \cdot \Delta t}{s \cdot \Delta V} \quad (2)$$

$$C_{s, m} = \frac{I \cdot \Delta t}{m \cdot \Delta V} \quad (3)$$

where  $I$ ,  $\Delta t$  and  $\Delta V$  represent the discharging current and time, potential range (excluding IR drop), respectively. The  $s$  and  $m$  represent the area and mass of active material on carbon cloth, respectively.

The volumetric energy ( $\text{mWh cm}^{-3}$ ) and power ( $\text{mW cm}^{-3}$ ) densities of the device were calculated based on

$$E = \frac{I \cdot \int V_{(t)} dt}{s \cdot 3600d} \quad (4)$$

$$P = \frac{3600E}{t_{discharge}} \quad (5)$$

where  $I$ ,  $d$ ,  $s$ ,  $V_{(t)}$  and  $t_{discharge}$  are the current, thickness, area of the ASC device, discharging voltage and the total discharging time, respectively. Both of  $V_{(t)}$  and  $t_{discharge}$  are taken into account for the calculation excluding the initial IR drop. And the gravimetric energy ( $\text{Wh Kg}^{-1}$ ) and power ( $\text{W Kg}^{-1}$ ) densities of the device were calculated based on replacing  $s$  in equation 4 with  $m$  (quantity of active substances in the device).

The real ( $C'$ ) and imaginary capacitances ( $C''$ ) were calculated by the following formulas

$$C' = -\frac{z''}{2\pi f |z|^2 s} \quad (6)$$

$$C'' = \frac{z'}{2\pi f |z|^2 s} \quad (7)$$

Where the  $Z'$ ,  $Z''$ ,  $Z$ ,  $f$ , and  $s$  replace the real and imaginary parts of the complex impedance, impedance modulus, frequency, and the geometrical area of the electrode.

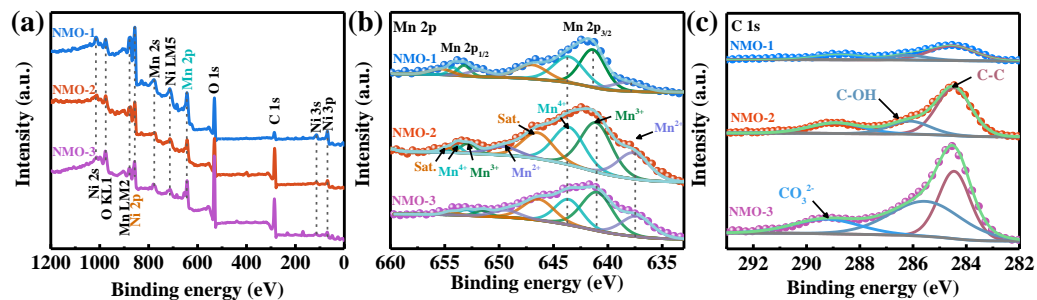

**Fig. S1.** (a, b, c) XPS spectra: survey, Mn 2p and C 1s of NMO-2@ACC.

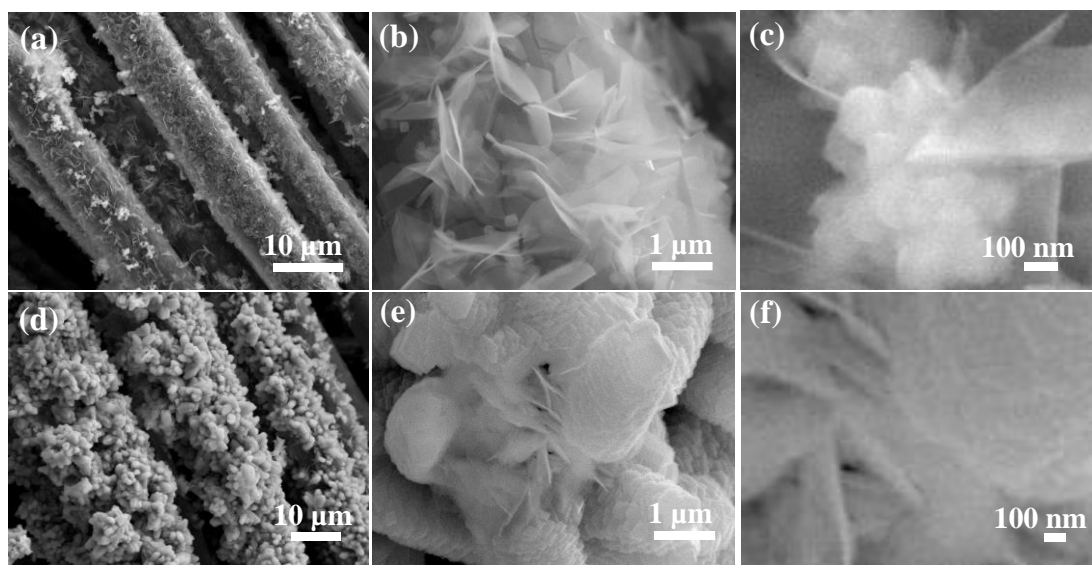

**Fig. S2.** FESEM images of NMO-2 at different magnification: (a-c) hydrothermal treatment at 80 °C and (d-f) 150 °C.

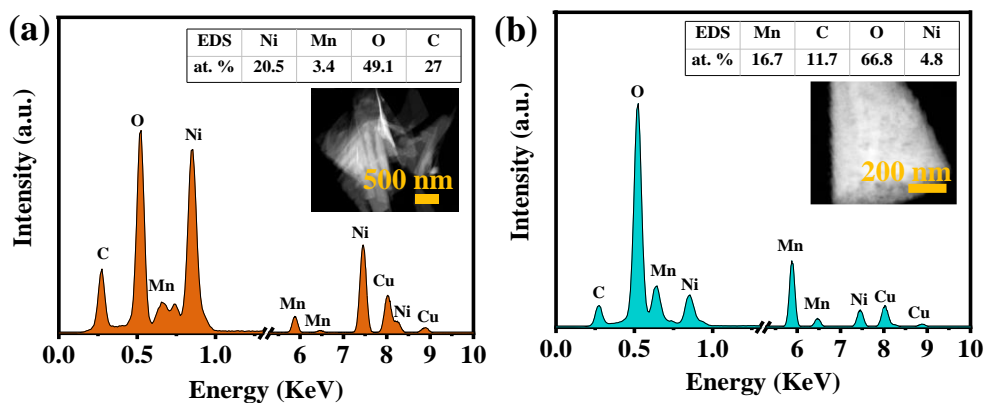

**Fig. S3.** (a, b) EDS spectra of the NMO-2@ACC at different areas.

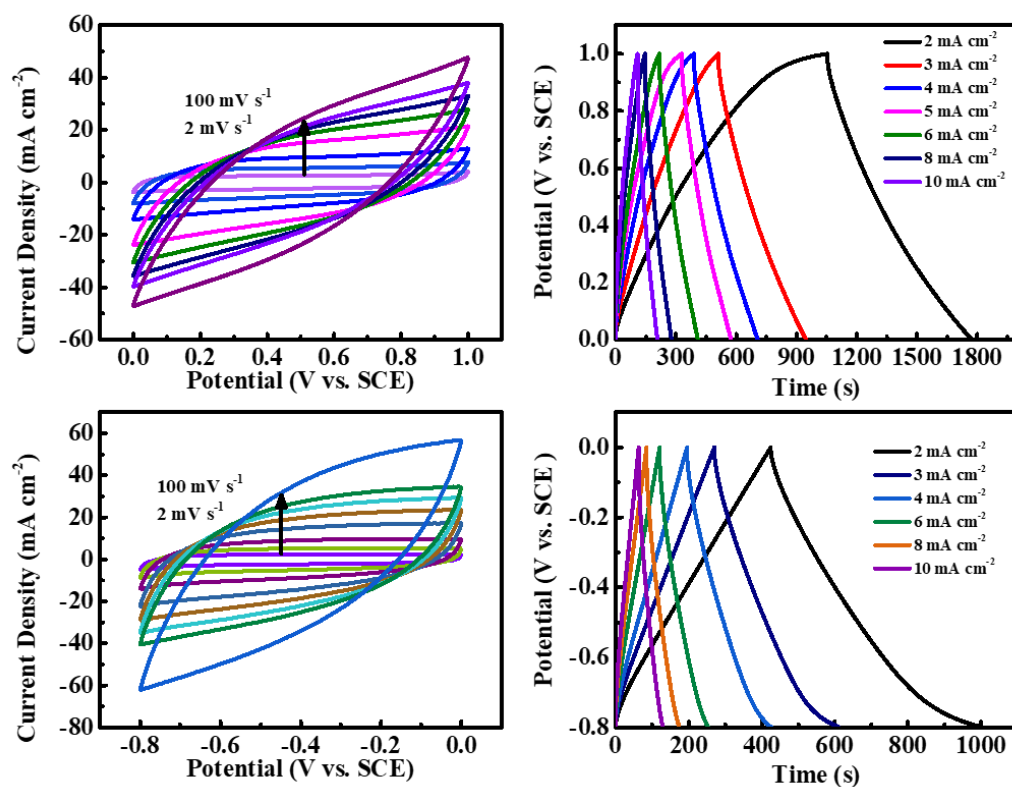

**Fig. S4.** CV and GCD curves of NMO-2@ACC within (a), (b) 0-1V and (c), (d) -0.8-0V.

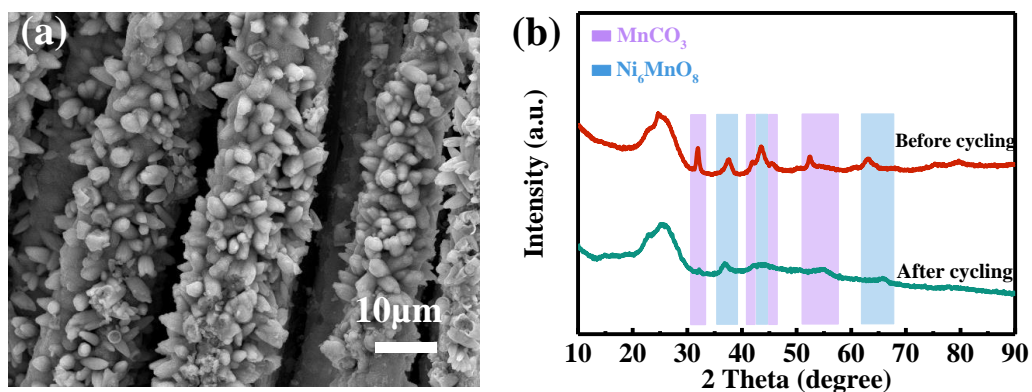

**Fig. S5.** (a) FESEM image of NMO-2@ACC after 5000<sup>th</sup> cycles. (b) XRD patterns of before and after cycling.

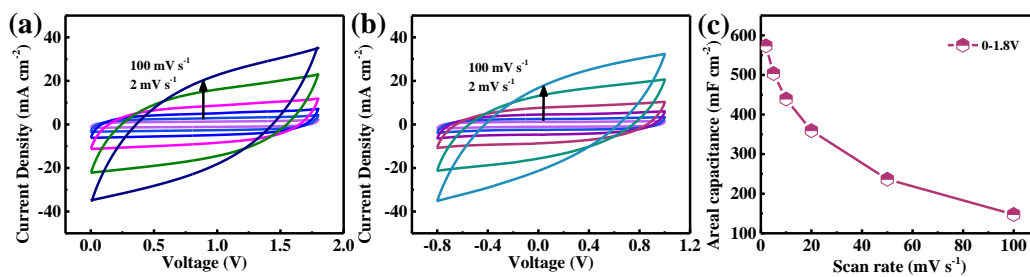

**Fig. S6.** (a) CV curves of NMO-2@ACC symmetric SC at voltage of 0-1.8 V and (b) - 0.8-1 V. (c) Corresponding areal capacitances of NMO-2@ACC symmetric SC.

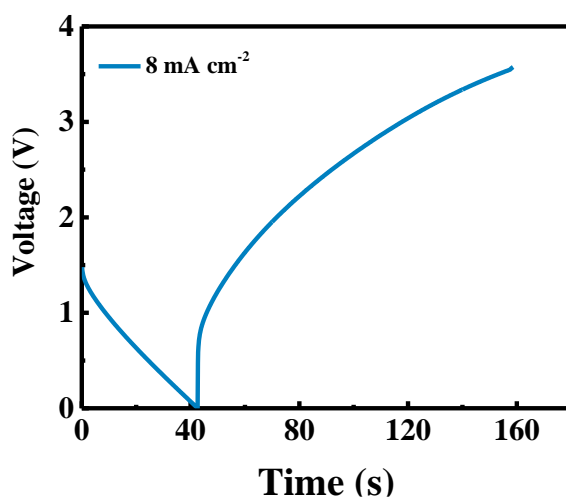

**Fig. S7.** GCD curve of 2 NMO-2@ACC SCs in series at a current density of 8 mA cm<sup>-2</sup>.

**Table S1.** Comparison of relative area ratio of  $\text{Mn}^{2+}$  in Mn 2p and  $\text{CO}_3^{2-}$  in O 1s high-resolution XPS spectra. (Take the largest peak area as unit one)

| Substance                 | NMO-1 | NMO-2 | NMO-3 |
|---------------------------|-------|-------|-------|
| $\text{Mn}^{2+}$ (Mn 2p)  | 0.32  | 0.59  | 0.68  |
| $\text{CO}_3^{2-}$ (O 1s) | 0.24  | 0.41  | 0.91  |
